# Supplementary material for: Epigallocatechin Gallate-Gold Nanoparticles Exhibit Superior Antitumor Activity Compared to Conventional Gold Nanoparticles: Potential Synergistic Interactions
Source: MDPI journal article supplement (doi:10.3390/nano9030396), 2019-03-08
Supplement: s1 [file s1]

# **Epigallocatechin Gallate-Gold Nanoparticles Exhibit Superior Antitumor Activity Compared To Conventional Gold Nanoparticles: Potential Synergistic Interactions**

Suhash Reddy Chavva, Sachin Kumar Deshmukh, Rajashekhar Kanchanapally, Nikhil Tyagi, Jason William Coym, Ajay Pratap Singh\*, Seema Singh\*

## **Supplementary Material**

### **Supplementary Methods**

#### **E-GNPs stability studies**

After washing and resuspending E-GNPs in DI water, their UV-Vis absorption spectrum was recorded, and they were stored at 4 °C. Their absorption spectrum was recorded intermittently for six months. As shown in (Figure S2), the peak shape or absorption intensity did not change even after 6 months indicating that the nanoparticles are very stable.

#### **RNA isolation and quantitative reverse transcription polymerase chain reaction (qRT-PCR)**

Total RNA from cell lines was extracted using TRIzol reagent (Invitrogen), and reverse-transcribed with high capacity cDNA Reverse Transcription Kit (Applied Biosystems). qRT-PCR was performed using cDNA as a template and SYBR Green Master Mix on an iCycler system (Bio-Rad, Hercules, CA, USA) with laminin receptor specific primer pair sets (Forward: TCACTCAGTGGGTTTGATGTG; Reverse: CACAGGACTAGAACACCTG). GAPDH served as an internal control (Forward: ACAACTTTGGTATCGTGGAAGG; Reverse: GCCATCACGCCACAGTTTC). Following thermal conditions were used: cycle 1: 95 °C for 10 min, cycle 2 (40): 95 °C for 10 s and 58 °C for 45 s.

## Supplementary figures

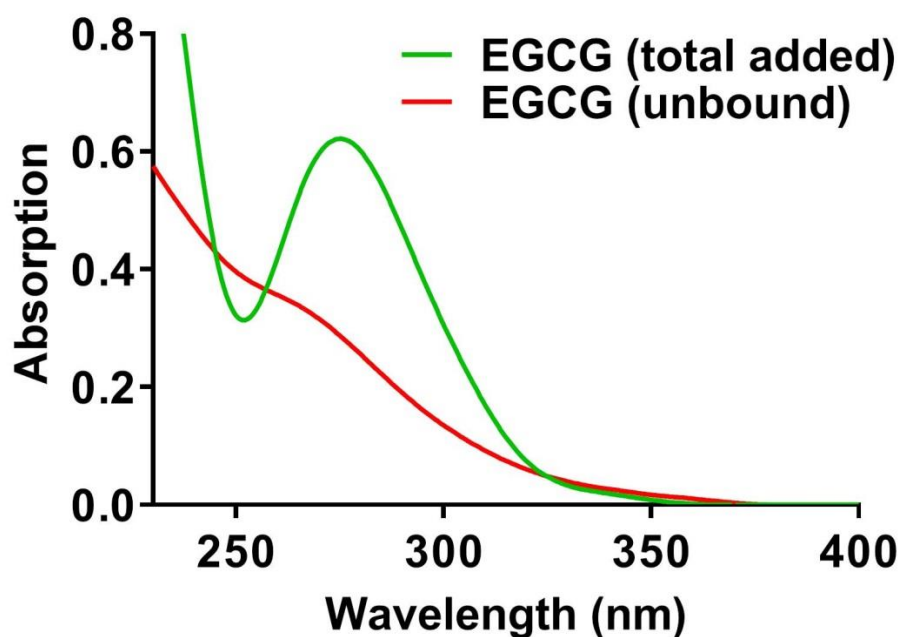

**Figure S1: Quantification of EGCG loading on GNP.** Absorption spectra of EGCG in the reaction mixture before and after E-GNPs synthesis.

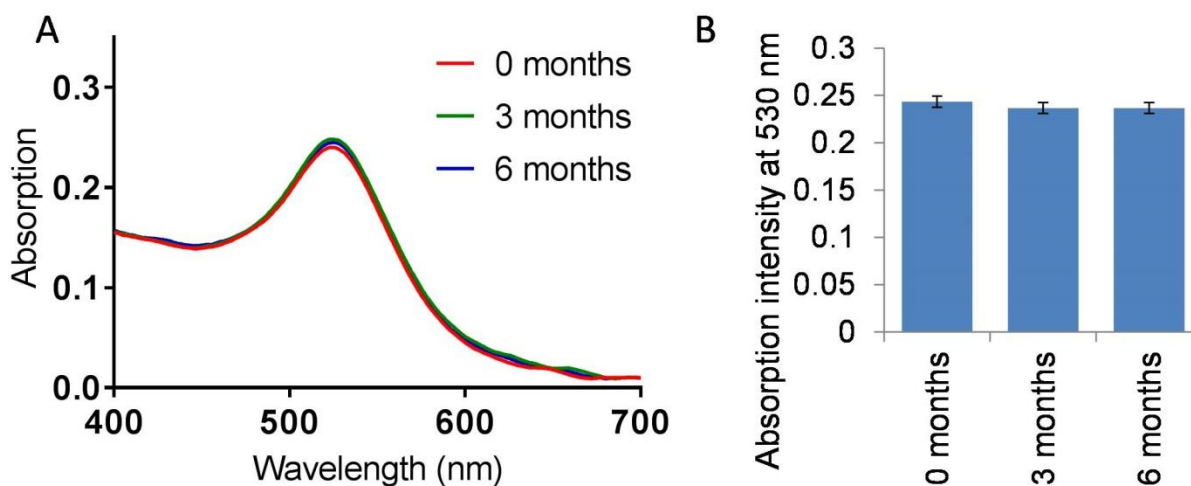

**Figure S2: E-GNPs stability studies.** (A) The time-dependent absorption spectrum of E-GNPs. (B) E-GNPs absorption intensity at 530 nm. Data represent the mean of triplicates  $\pm$  SD.

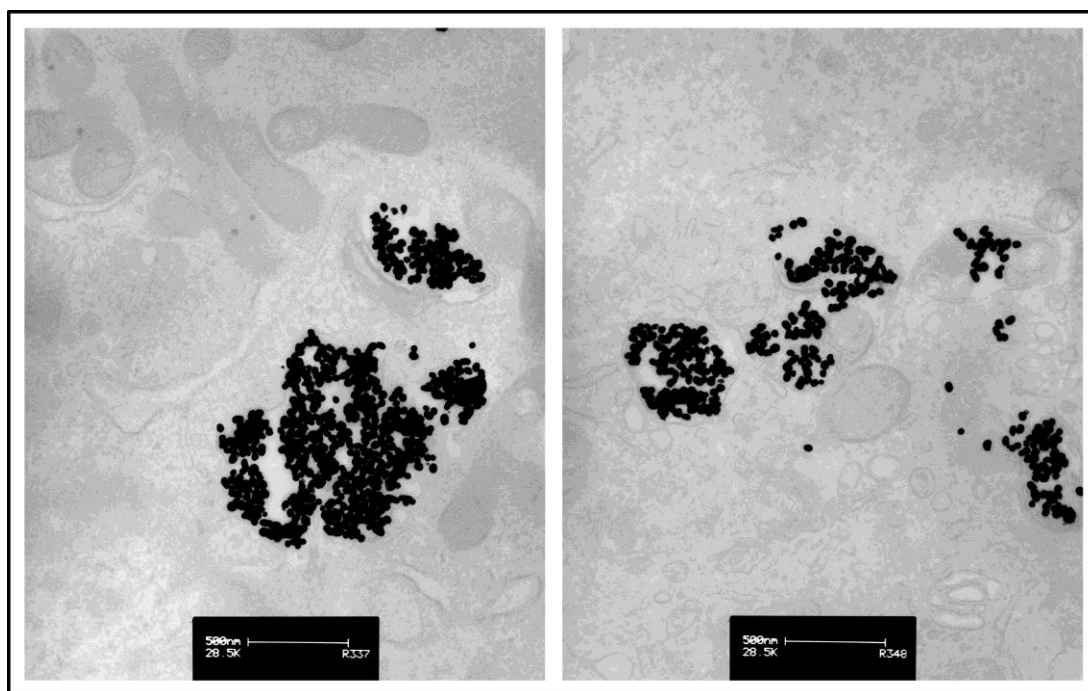

**Figure S3: Representative TEM images at high magnification (28500X).**

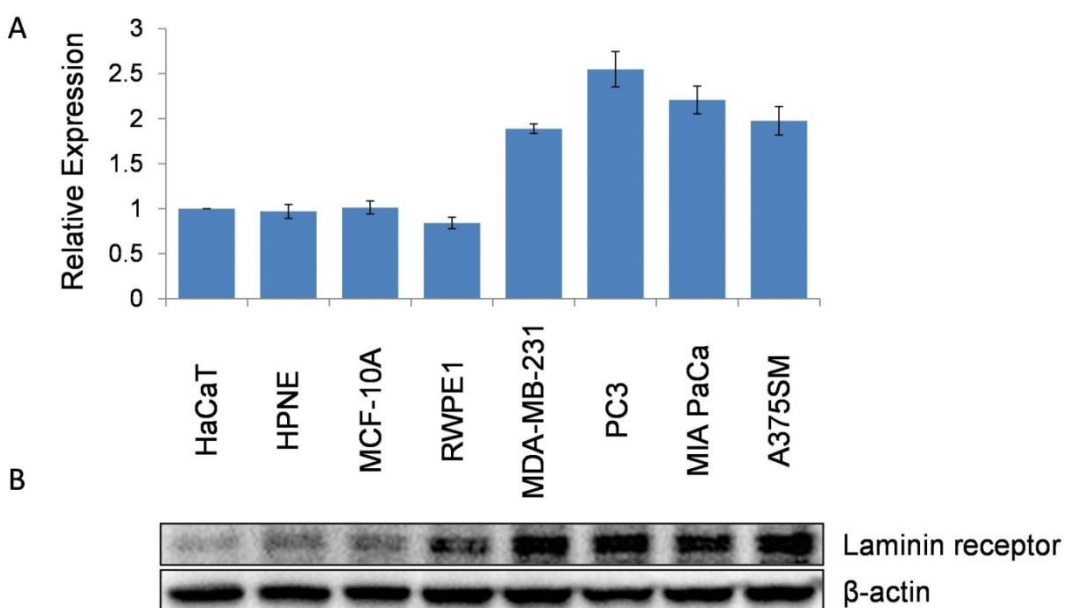

**Figure S4: Laminin receptor expression in cancerous and noncancerous cell lines. (A) PCR data. Data represent the mean of triplicates  $\pm$  SD. (B) Western blot.**
